# Supplementary material for: Comparison of different semi-automated cfDNA extraction methods in combination with UMI-based targeted sequencing
Source: PubMed Central journal article supplement (PMC6779285; doi:10.18632/oncotarget.27183), 2019-10-01
Supplement: oncotarget-10-5690-s001.pdf [file oncotarget-10-5690-s001.pdf]

## Comparison of different semi-automated cfDNA extraction methods in combination with UMI-based targeted sequencing

### SUPPLEMENTARY MATERIALS

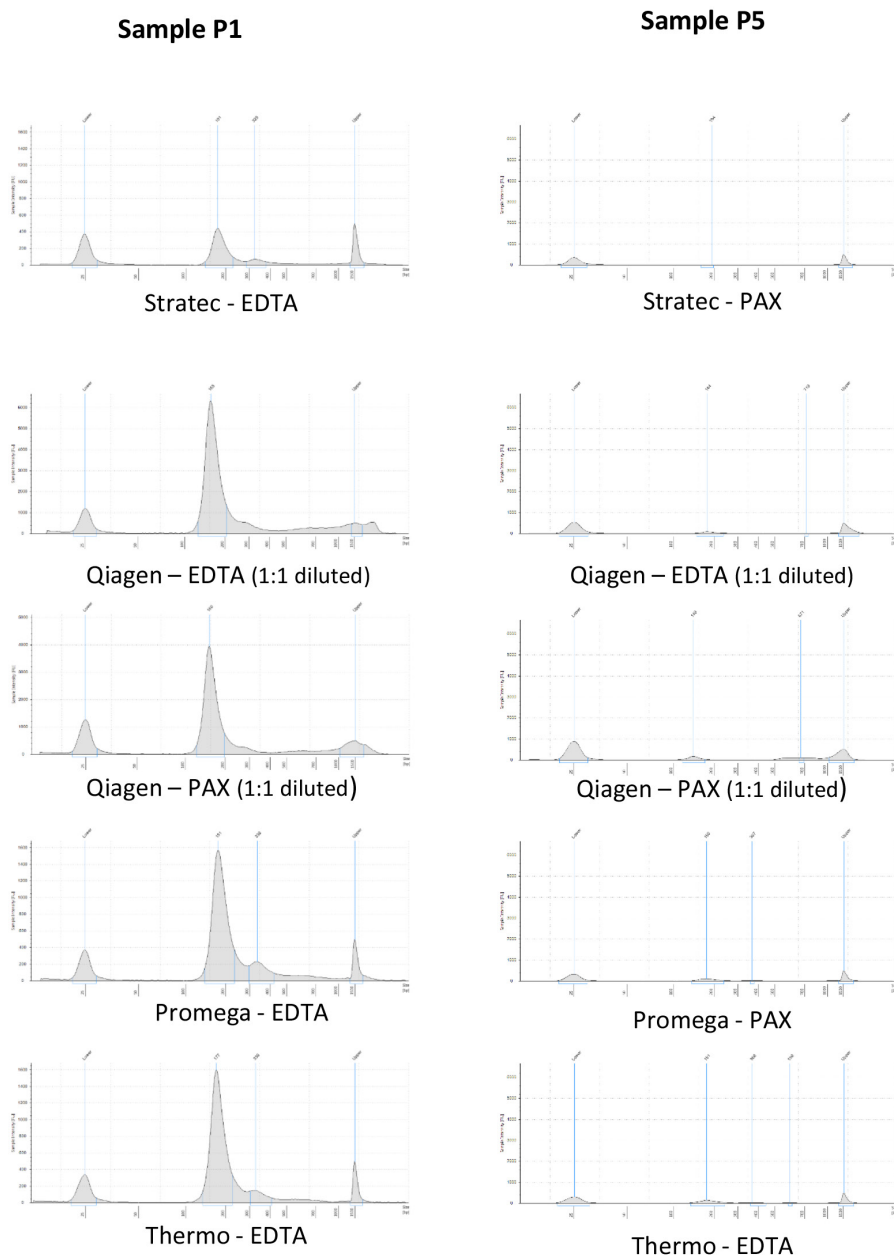

**Supplementary Figure 1: Assessment of cfDNA quality by fragment length analysis.** *Left panel:* cfDNA profile comparison between the different extraction methods for sample P1. The profiles (concentration from 0.8-7ng/ $\mu$ l) show the typical patterns for cfDNA with peaks at 175bp and 353bp. The calculated concentrations from the TapeStation correspond approximately to the measured values by QuBit. *Right panel:* cfDNA profiles for sample P5 (concentration range 0.057-0.5ng/ $\mu$ l). Peak intensities for most other samples not illustrated here show similar patterns.

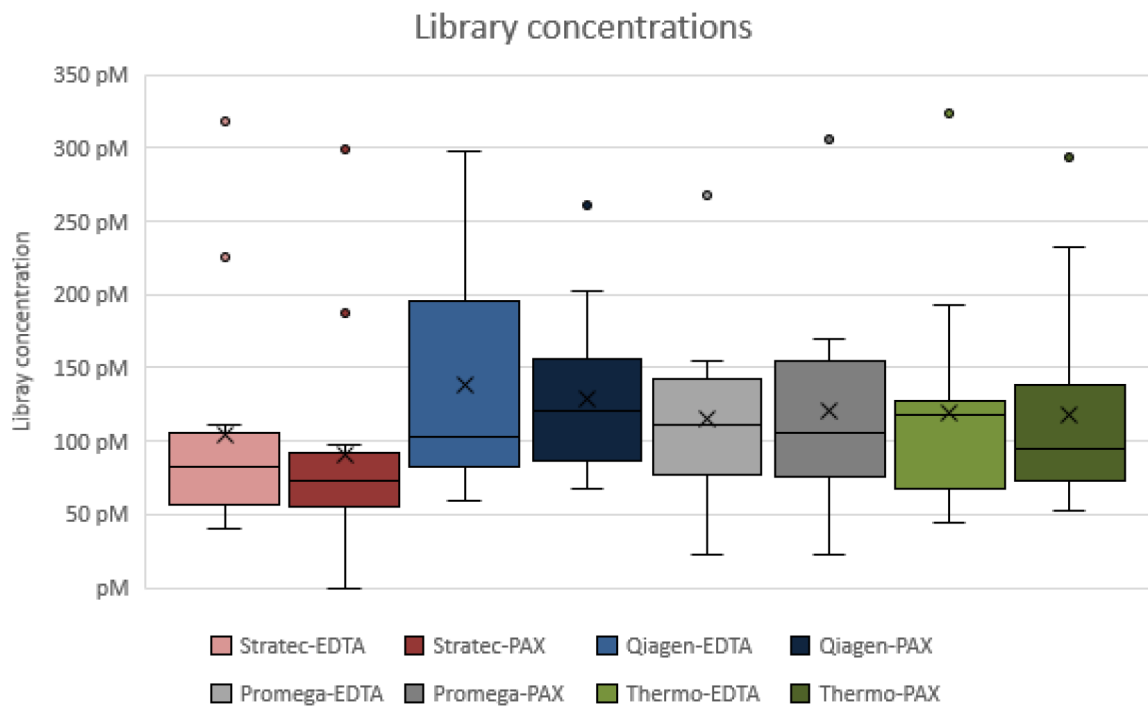

**Supplementary Figure 2: Box and Whisker plot comparing the library concentrations measured by qPCR for all samples.** The library concentrations from Stratec are significantly lower compared to Qiagen or Thermo (paired t-test:  $p=0.0024$  and  $p=0.026$ ), but not to Promega (paired t-test:  $p=0.118$ ).

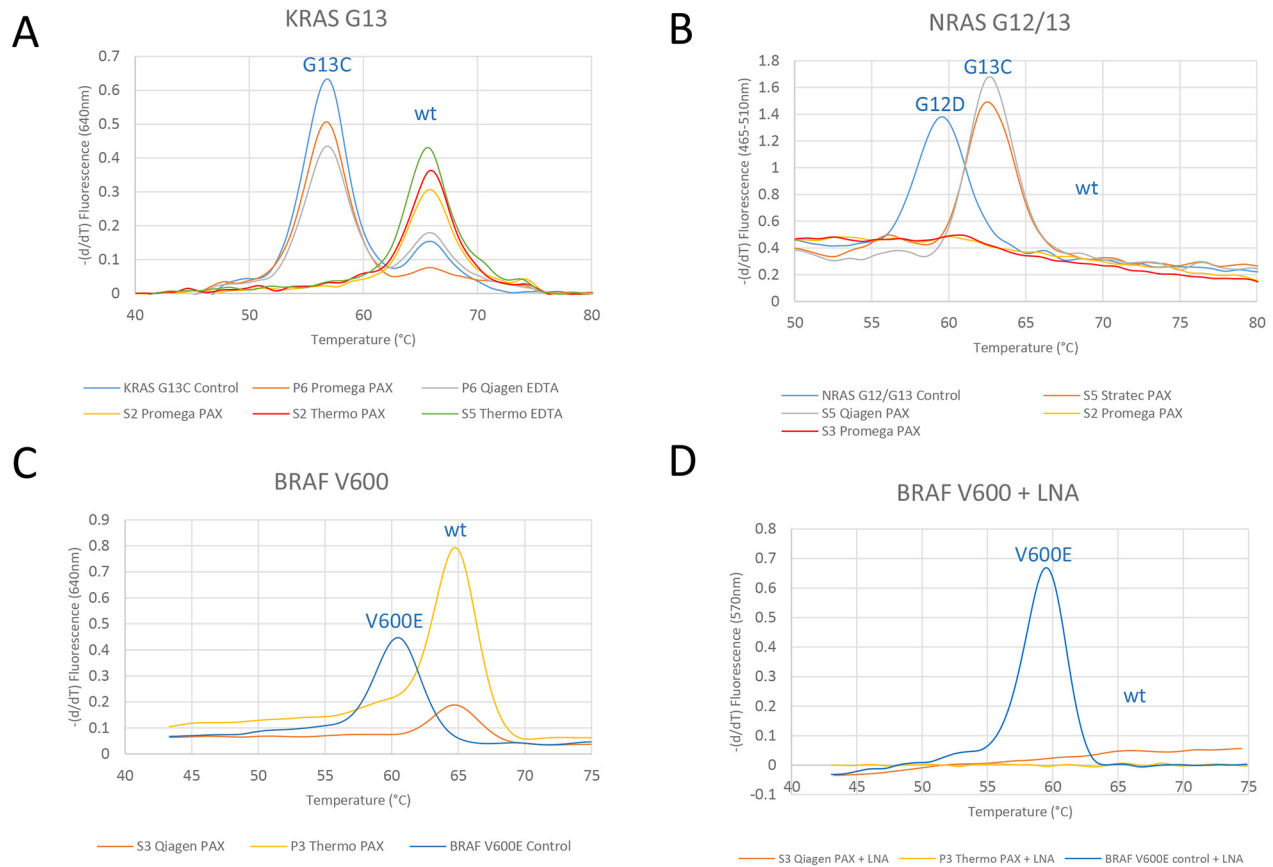

**Supplementary Figure 3: Validation of NGS results by high-sensitive clamped real-time assays. (A)** KRAS G12/G13 assay. The peak at 56.2°C corresponds to the KRAS p.G13C mutation, while the peak at 65°C represents the wildtype situation. Sample P6 with a KRAS p.G13C mutation detected by NGS in all analyzed extractions shows a clear peak at 56.2°C, confirming NGS results. In sample S2 (Thermo/PAXgene) and S5 (Thermo/EDTA), a KRAS p.G13S was detected by NGS with low molecular allele coverage. In the clamped assay, only the peak at 65°C – representing the wildtype- is visible, unmasking these mutations as artefacts. **(B)** Clamped real-time assay for NRAS G12/G13 mutations. The peak at ~59°C depicts the NRAS p.G12D mutation, while the peak at ~62°C marks a p.G13C mutation that was identified in sample S5. In sample S2 (Promega/EDTA) and S3 (Promega/PAXgene), no peaks are visible indicating wildtype (wildtype peak completely suppressed by LNA). **(C and D)** BRAF V600 assay without (C) and with LNA (D). In the presence of LNA, the wildtype peak is suppressed. Both tested samples that showed low-frequency BRAF V600E mutations by NGS are negative by the real-time assay.

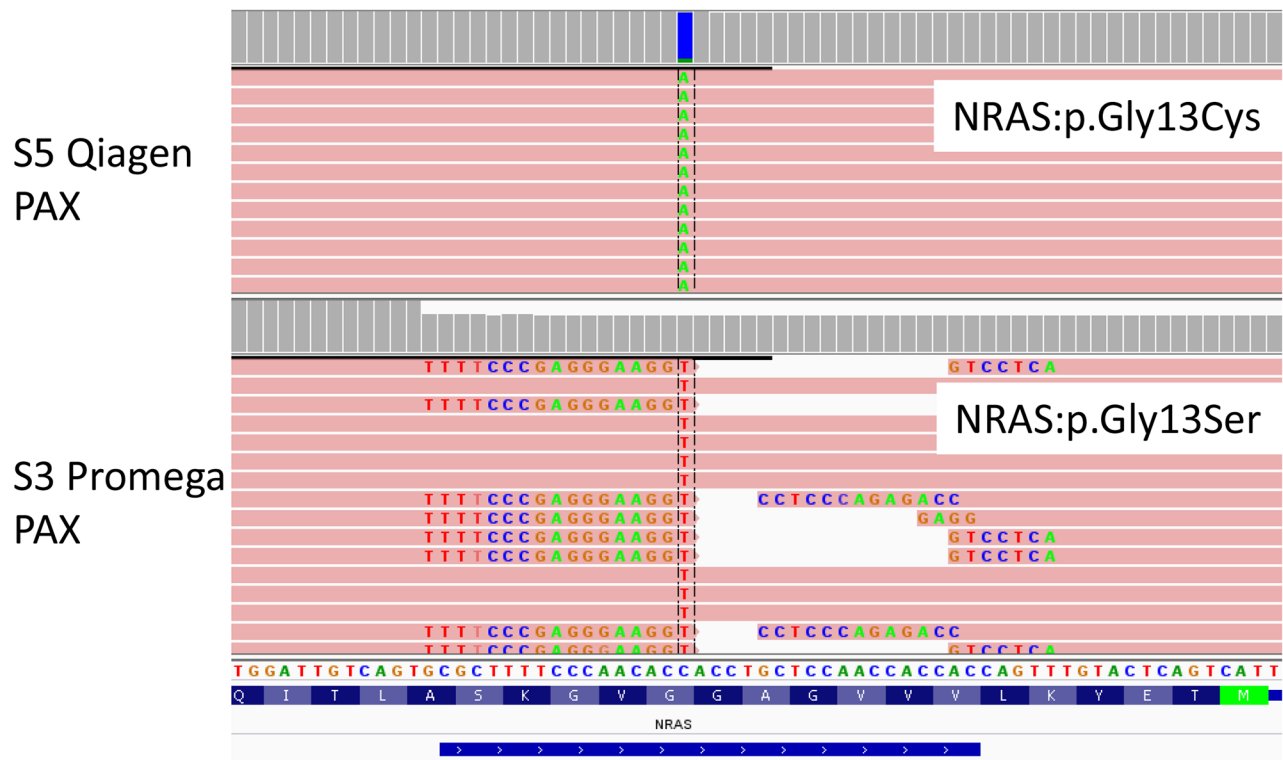

**Supplementary Figure 4: Visualization of artefactual variants by IGV browser.** Note the presence of the false-positive base exchange at softclipped positions in incomplete reads.

**Supplementary Table 1: Mutations identified in the different cfDNA extractions.**

See Supplementary File 1

**Supplementary Table 2: Overview of sequencing artefacts found in cfDNA.**

See Supplementary File 2

**Supplementary Table 3: Validation of NGS results**

| Sample ID | plasma | cfKit   | mutation real | expected artefact | Real Time PCR |
|-----------|--------|---------|---------------|-------------------|---------------|
| P1        | edta   | stratec |               | KRAS G13S         | neg.          |
| P1        | pax    | stratec |               | KRAS G13S         | neg.          |
| P1        | pax    | thermo  |               | wt                | neg.          |
| P6        | edta   | stratec | KRAS G13C     |                   | neg.          |
| P6        | edta   | qiagen  | KRAS G13C     |                   | pos.          |
| P6        | pax    | promega | KRAS G13C     | KRAS G13S         | pos. for G13C |
| P3        | pax    | qiagen  |               | NRAS G12fs*       | neg.          |
| S2        | pax    | promega |               | KRAS G13S         | neg.          |
| S2        | pax    | thermo  |               | KRAS G13C         | neg.          |
| S3        | pax    | promega |               | NRAS G13S         | neg.          |
| S5        | edta   | stratec | NRAS G13C     |                   | pos.          |
| S5        | pax    | stratec | NRAS G13C     |                   | pos.          |
| S5        | edta   | qiagen  | NRAS G13C     |                   | not tested    |
| S5        | pax    | qiagen  | NRAS G13C     |                   | pos.          |
| S5        | edta   | thermo  | NRAS G13C     |                   | pos.          |
| P3        | pax    | thermo  |               | BRAF V600E        | neg.          |
| S3        | pax    | qiagen  |               | BRAF V600E        | neg.          |
